# Supplementary material for: Real-Time Polymerase Chain Reaction for the Detection of Helicobacter pylori and Clarithromycin Resistance
Source: PubMed Central journal article supplement — Gut Liver. 2022 Jul 20;17(3):375–81. doi: 10.5009/gnl220076 (PMC10191795; doi:10.5009/gnl220076), 2022-07-20
Supplement: gnl-17-3-375-supple.pdf [file gnl-17-3-375-supple.pdf]

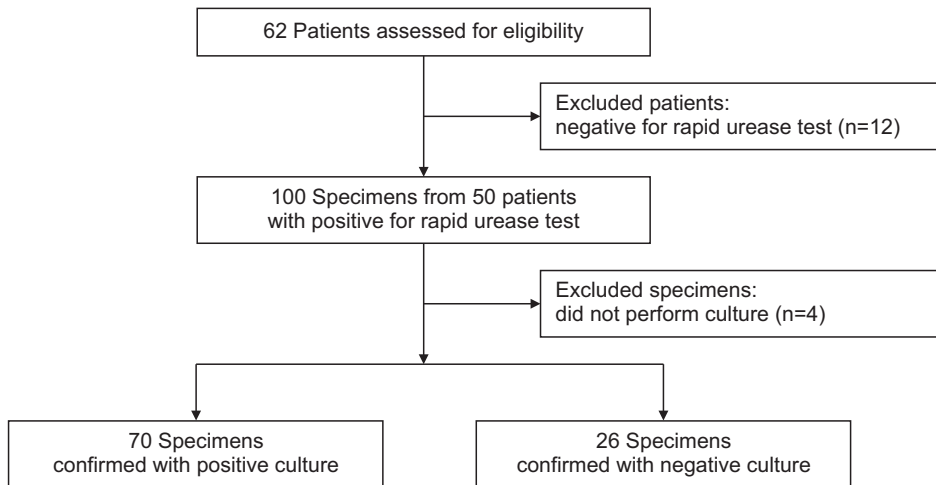

**Supplementary Fig. 1.** Flowchart of study enrollment.

**Supplementary Table 1.** Culture Detection, *Helicobacter pylori* IgG Antibody Testing, RUT, and RT-PCR Results

| Patient No. | Culture | <i>H. pylori</i> IgG antibody | RUT | RT-PCR |
|-------------|---------|-------------------------------|-----|--------|
| 1           | 1       | 1                             | 1   | 1      |
| 2           | 1       | 1                             | 1   | 1      |
| 3           | 1       | 1                             | 1   | 0      |
| 4           | 1       | 1                             | 0   | 1      |
| 5           | 1       | 1                             | 1   | 1      |
| 6           | 1       | 1                             | 1   | 1      |
| 7           | 1       | 1                             | 1   | 1      |
| 8           | 1       | 1                             | 1   | 1      |
| 9           | 1       | 1                             | 0   | 1      |
| 10          | 1       | 1                             | 1   | 1      |
| 11          | 1       | 1                             | 1   | 1      |
| 12          | 1       | 1                             | 1   | 1      |
| 13          | 1       | 1                             | 1   | 1      |
| 14          | 1       | 1                             | 1   | 1      |
| 15          | 1       | 1                             | 1   | 1      |
| 16          | 1       | 1                             | 0   | 1      |
| 17          | 1       | 1                             | 1   | 1      |
| 18          | 1       | 1                             | 1   | 1      |
| 19          | 1       | 1                             | 1   | 1      |
| 20          | 1       | 1                             | 1   | 1      |
| 21          | 1       | 1                             | 1   | 1      |
| 22          | 1       | 1                             | 1   | 1      |
| 23          | 1       | 1                             | 0   | 1      |
| 24          | 1       | 1                             | 1   | 1      |
| 25          | 1       | 1                             | 1   | 1      |
| 26          | 1       | 1                             | 1   | 1      |
| 27          | 1       | 1                             | 1   | 1      |
| 28          | 1       | 1                             | 1   | 1      |
| 29          | 1       | 1                             | 1   | 1      |
| 30          | 1       | 0                             | 1   | 1      |
| 31          | 1       | 0                             | 1   | 1      |
| 32          | 1       | 1                             | 0   | 1      |
| 33          | 1       | 1                             | 1   | 1      |
| 34          | 1       | 1                             | 0   | 1      |
| 35          | 1       | 1                             | 1   | 1      |
| 36          | 1       | 1                             | 1   | 1      |
| 37          | 1       | 1                             | 0   | 1      |
| 38          | 1       | 1                             | 0   | 1      |
| 39          | 1       | 1                             | 1   | 0      |
| 40          | 1       | 1                             | 1   | 1      |
| 41          | 1       | 1                             | 1   | 1      |
| 42          | 1       | 1                             | 1   | 1      |
| 43          | 1       | 1                             | 1   | 1      |
| 44          | 1       | 1                             | 1   | 1      |
| 45          | 1       | 1                             | 1   | 1      |
| 46          | 1       | 1                             | 1   | 1      |
| 47          | 1       | 1                             | 0   | 1      |
| 48          | 1       | 1                             | 1   | 1      |
| 49          | 1       | 0                             | 1   | 1      |
| 50          | 1       | 0                             | 1   | 1      |
| 51          | 1       | 1                             | 1   | 1      |

**Supplementary Table 1.** Continued

| Patient No. | Culture | <i>H. pylori</i> IgG antibody | RUT | RT-PCR |
|-------------|---------|-------------------------------|-----|--------|
| 52          | 1       | 1                             | 1   | 1      |
| 53          | 1       | 1                             | 1   | 1      |
| 54          | 1       | 1                             | 1   | 1      |
| 55          | 1       | 1                             | 1   | 1      |
| 56          | 1       | 1                             | 1   | 1      |
| 57          | 1       | 1                             | 1   | 1      |
| 58          | 1       | 1                             | 1   | 1      |
| 59          | 1       | 1                             | 1   | 1      |
| 60          | 1       | 1                             | 0   | 1      |
| 61          | 1       | 1                             | 1   | 1      |
| 62          | 1       | 1                             | 0   | 1      |
| 63          | 1       | 1                             | 1   | 1      |
| 64          | 1       | 1                             | 1   | 1      |
| 65          | 1       | 1                             | 1   | 1      |
| 66          | 1       | 1                             | 1   | 1      |
| 67          | 1       | 1                             | 1   | 1      |
| 68          | 1       | 1                             | 1   | 1      |
| 69          | 1       | 1                             | 0   | 1      |
| 70          | 1       | 1                             | 1   | 1      |

IgG, immunoglobulin G; RUT, rapid urease test; RT-PCR, real-time polymerase chain reaction; 0, negative; 1, positive.
